# Supplementary material
Source: PubMed Central journal article supplement (PMC9063900)
Supplement: ASN.2021060735SupplementaryData.pdf [file ASN.2021060735SupplementaryData.pdf]

## **SUPPLEMENTAL MATERIAL**

**Supplemental Table 1:** Comparison of AASK and VA NEPHRON-D participants who were included vs. excluded from primary analyses.

**Supplemental Table 2:** Number of ESKD events and participants by subgroups of GFR slope and biomarker slope in AASK.

**Supplemental Table 3:** Comparison of models by Harrell's C Statistic and Brier Score in AASK and VA NEPHRON-D.

**Supplemental Table 4:** Number of kidney function decline events and participants by subgroups of eGFR change and biomarker change in VA NEPHRON-D.

**Supplemental Figure 1:** Flowchart of study population for primary analyses in a) AASK and b) VA NEPHRON-D.

**Supplemental Figure 2:** Pearson's correlation coefficients of TNFR1 and TNFR2 slopes with biomarker levels and kidney function measures in AASK.

**Supplemental Figure 3:** Distributions of baseline TNFR1 and TNFR2 in AASK and VA NEPHRON-D, by outcome.

**Supplemental Figure 4:** Calibration plots of observed vs. predicted 5-year risk for ESKD in AASK and 2-year risk for kidney function decline in VA NEPHRON-D.

**Supplemental Figure 5:** Pearson's correlation coefficients of TNFR1 and TNFR2 change with biomarker levels and kidney function measures in VA NEPHRON-D.

**CKD Biomarkers Consortium Collaborators: Phase II: Group Members and Affiliations**

Supplemental Table 1: Comparison of AASK and VA NEPHRON-D participants who were included vs. excluded from primary analyses.

| <b>AASK</b>                         |                       |                         |                             |                             |                |
|-------------------------------------|-----------------------|-------------------------|-----------------------------|-----------------------------|----------------|
| <b>Characteristic</b>               |                       | <b>All<br/>(n=1094)</b> | <b>Excluded<br/>(n=676)</b> | <b>Included<br/>(n=418)</b> | <b>p-value</b> |
| Age, years                          |                       | 54.6 ± 10.7             | 54.9 ± 10.7                 | 54.2 ± 10.7                 | 0.28           |
| Female                              |                       | 425 (39%)               | 265 (39%)                   | 160 (38%)                   | 0.76           |
| European ancestry, %**              |                       | 16.7 ± 13.3             | 16.9 ± 13.7                 | 16.4 ± 12.8                 | 0.63           |
| APOL1**                             | Low-risk              | 533 (77%)               | 302 (78%)                   | 231 (75%)                   | 0.35           |
|                                     | High-risk             | 160 (23%)               | 84 (22%)                    | 76 (25%)                    |                |
| Systolic blood pressure, mm Hg      |                       | 150 ± 24                | 150 ± 23                    | 151 ± 25                    | 0.39           |
| Body mass index, kg/ m <sup>2</sup> |                       | 30.6 ± 6.6              | 30.3 ± 6.6                  | 31.0 ± 6.5                  | 0.08           |
| Smoking                             |                       | 321 (29%)               | 215 (32%)                   | 106 (25%)                   | 0.02           |
| GFR, ml/min/1.73 m <sup>2</sup>     |                       | 45.6 ± 13.0             | 45.7 ± 13.5                 | 45.5 ± 12.3                 | 0.85           |
| UPCR, g/g Cr                        |                       | 0.08 (0.03, 0.36)       | 0.08 (0.03, 0.41)           | 0.08 (0.03, 0.32)           | 0.27           |
| Blood pressure goal                 | MAP ≤92               | 540 (49%)               | 329 (49%)                   | 211 (50%)                   | 0.56           |
|                                     | MAP 102-107           | 554 (51%)               | 347 (51%)                   | 207 (50%)                   |                |
| Blood pressure drug                 | Ramipril              | 436 (40.0%)             | 273 (40%)                   | 163 (39%)                   | 0.78           |
|                                     | Metoprolol            | 441 (40%)               | 267 (39%)                   | 174 (42%)                   |                |
|                                     | Amlodipine            | 217 (20%)               | 136 (20%)                   | 81 (19%)                    |                |
| <b>VA NEPHRON-D</b>                 |                       |                         |                             |                             |                |
| <b>Characteristic</b>               |                       | <b>All<br/>(n=1448)</b> | <b>Excluded<br/>(n=694)</b> | <b>Included<br/>(n=754)</b> | <b>p-value</b> |
| Age, years                          |                       | 64.6 ± 7.8              | 64.4 ± 8.1                  | 64.8 ± 7.6                  | 0.40           |
| Male                                |                       | 1436 (99%)              | 688 (99%)                   | 748 (99%)                   | 0.89           |
| Race                                | Black                 | 345 (24%)               | 183 (26%)                   | 162 (21%)                   | 0.06           |
|                                     | White                 | 1051 (73%)              | 490 (71%)                   | 561 (74%)                   |                |
|                                     | Other***              | 52 (4%)                 | 21 (3%)                     | 31 (4%)                     |                |
| Systolic blood pressure, mm Hg      |                       | 137 ± 16                | 138 ± 17                    | 136 ± 16                    | 0.01           |
| Body mass index, kg/m <sup>2</sup>  |                       | 34.6 ± 6.9              | 34.6 ± 7.1                  | 34.6 ± 6.7                  | 0.94           |
| Smoking                             |                       | 284 (20%)               | 132 (19%)                   | 152 (20%)                   | 0.04           |
| Hemoglobin A1c, %                   |                       | 7.8 ± 1.3               | 7.8 ± 1.2                   | 7.8 ± 1.3                   | 0.35           |
| eGFR, ml/min/1.73 m <sup>2</sup>    |                       | 56.1 ± 18.7             | 55.6 ± 18.6                 | 56.6 ± 18.8                 | 0.27           |
| UACR, g/g Cr                        |                       | 0.84 (0.42, 0.17)       | 0.93 (0.44, 0.20)           | 0.80 (0.42, 0.16)           | 0.05           |
| Randomized group                    | Losartan              | 724 (50%)               | 346 (50%)                   | 378 (50%)                   | 0.92           |
|                                     | Losartan + lisinopril | 724 (50%)               | 348 (50%)                   | 376 (50%)                   |                |

\*p-values comparing included vs. excluded (missing biomarker specimen or had event prior to 12 months) and determined using ANOVA, Wilcoxon rank-sum, and Pearson's chi-squared tests in AASK and Wilcoxon rank-sum and chi-squared tests in VA NEPHRON-D.

\*\*APOL1 risk status and European ancestry were available in 693 of 1094 AASK participants.

\*\*\*Other defined as American Indian or Alaska Native, Asian, or Native Hawaiian or Other Pacific Islander.

Supplemental Table 2: Number of ESKD events and participants by subgroups of GFR slope and biomarker slope in AASK.

|           |          | TNFR1 slope     |                    |                    |
|-----------|----------|-----------------|--------------------|--------------------|
|           |          | Negative        | Positive           | Total              |
| GFR slope | Positive | 1/55<br>(1.8%)  | 2/30<br>(6.7%)     | 3/85<br>(3.5%)     |
|           | Stable   | 6/46<br>(13.0%) | 8/43<br>(18.6%)    | 14/89<br>(15.7%)   |
|           | Negative | 2/29<br>(6.9%)  | 110/215<br>(51.2%) | 112/244<br>(45.9%) |
|           | Total    | 9/130<br>(6.9%) | 120/288<br>(41.7%) | 129/418<br>(30.9%) |

|           |          | TNFR2 slope       |                    |                    |
|-----------|----------|-------------------|--------------------|--------------------|
|           |          | Negative          | Positive           | Total              |
| GFR slope | Positive | 2/58<br>(3.4%)    | 1/27<br>(3.7%)     | 3/85<br>(3.5%)     |
|           | Stable   | 5/44<br>(11.4%)   | 9/45<br>(20.0%)    | 14/89<br>(15.7%)   |
|           | Negative | 9/48<br>(18.8%)   | 103/196<br>(52.6%) | 112/244<br>(45.9%) |
|           | Total    | 16/150<br>(10.7%) | 113/268<br>(42.2%) | 129/418<br>(30.9%) |

Data in each cell presented as # of ESKD events/# of participants (% with event).

For GFR slope, positive, stable, and negative are defined as GFR changes of >1 ml/min/1.73 m<sup>2</sup>/year, -1 to 1 ml/min/1.73 m<sup>2</sup>/year, and <-1 ml/min/1.73 m<sup>2</sup>/year, respectively.

Supplemental Table 3: Comparison of models by Harrell's C Statistic and Brier Score in AASK and VA NEPHRON-D.

| Model                                                                                                   | Harrell's C Statistic<br>(95% CI) | Difference in C Statistics<br>(95% CI) | Brier Score* |
|---------------------------------------------------------------------------------------------------------|-----------------------------------|----------------------------------------|--------------|
| <b>AASK</b>                                                                                             |                                   |                                        |              |
| Clinical Model: Adjusted for age, sex, SBP, BMI, current smoking, GFR, ln(UPCR)                         | 0.836<br>(0.804 to 0.868)         | Ref                                    | 0.105        |
| Clinical Model + $t_0$ ln(TNFR1)                                                                        | 0.844<br>(0.813 to 0.875)         | 0.008<br>(-0.002 to 0.018)             | 0.106        |
| Clinical Model + $t_0$ ln(TNFR1) + ln(TNFR1) slope                                                      | 0.891<br>(0.866 to 0.916)         | 0.055<br>(0.034 to 0.076)              | 0.085        |
| Clinical Model + $t_0$ ln(TNFR2)                                                                        | 0.844<br>(0.814 to 0.874)         | 0.008<br>(-0.003 to 0.018)             | 0.106        |
| Clinical Model + $t_0$ ln(TNFR2) + ln(TNFR2) slope                                                      | 0.878<br>(0.853 to 0.903)         | 0.042<br>(0.025 to 0.059)              | 0.091        |
| <b>VA NEPHRON-D</b>                                                                                     |                                   |                                        |              |
| Clinical Model: Adjusted for age, sex, race, SBP, BMI, HgbA1c, smoking, eGFR, and ln(UACR) at 0 months. | 0.749<br>(0.699 to 0.799)         | Ref                                    | 0.101        |
| Clinical Model + $t_0$ ln(TNFR1)                                                                        | 0.777<br>(0.733 to 0.820)         | 0.028<br>(-0.002 to 0.057)             | 0.100        |
| Clinical Model + $t_0$ ln(TNFR1) + ln(TNFR1) change                                                     | 0.819<br>(0.780 to 0.858)         | 0.070<br>(0.032 to 0.108)              | 0.101        |
| Clinical Model + $t_0$ ln(TNFR2)                                                                        | 0.765<br>(0.719 to 0.811)         | 0.015<br>(0.001 to 0.030)              | 0.100        |
| Clinical Model + $t_0$ ln(TNFR2) + ln(TNFR2) change                                                     | 0.804<br>(0.766 to 0.843)         | 0.055<br>(0.024 to 0.086)              | 0.101        |

Abbreviations: SBP=systolic blood pressure; BMI=body mass index; HgbA1c=hemoglobin A1c; GFR=measured glomerular filtration rate; eGFR=estimated glomerular filtration rate; UPCR=urine protein-to-creatinine ratio; UACR=urine albumin-to-creatinine ratio; TNFR1=soluble tumor necrosis factor receptor 1; TNFR2=soluble tumor necrosis factor receptor 2;  $t_0$ =measurement at 0 months.

\*5-year risk for ESKD in AASK and 2-year risk for kidney function decline in VA NEPHRON-D.

Supplemental Table 4: Number of kidney function decline events and participants by subgroups of eGFR change and biomarker change in VA NEPHRON-D.

|             |          | TNFR1 change      |                   |                    |
|-------------|----------|-------------------|-------------------|--------------------|
|             |          | Negative          | Positive          | Total              |
| eGFR change | Positive | 3/66<br>(4.5%)    | 3/83<br>(3.6%)    | 6/149<br>(4.0%)    |
|             | Stable   | 5/39<br>(12.8%)   | 7/52<br>(13.5%)   | 12/91<br>(13.2%)   |
|             | Negative | 21/149<br>(14.1%) | 72/336<br>(21.4%) | 93/485<br>(19.2%)  |
|             | Total    | 29/254<br>(11.4%) | 82/471<br>(17.4%) | 111/725<br>(15.3%) |

|             |          | TNFR2 change     |                   |                    |
|-------------|----------|------------------|-------------------|--------------------|
|             |          | Negative         | Positive          | Total              |
| eGFR change | Positive | 4/78<br>(5.1%)   | 2/71<br>(2.8%)    | 6/149<br>(4.0%)    |
|             | Stable   | 5/42<br>(11.9%)  | 7/49<br>(14.3%)   | 12/91<br>(13.2%)   |
|             | Negative | 15/172<br>(8.7%) | 78/313<br>(24.9%) | 93/485<br>(19.2%)  |
|             | Total    | 24/292<br>(8.2%) | 87/433<br>(20.1%) | 111/725<br>(15.3%) |

Data in each cell presented as # of kidney function decline events/# of participants (% with event).

Abbreviations: eGFR=estimated glomerular filtration rate; TNFR1=soluble tumor necrosis factor receptor 1; TNFR2=soluble tumor necrosis factor receptor 2.

For eGFR change, positive, stable, and negative are defined as eGFR changes of >1 ml/min/1.73 m<sup>2</sup>/year, -1 to 1 ml/min/1.73 m<sup>2</sup>/year, and <-1 ml/min/1.73 m<sup>2</sup>/year, respectively.

Supplemental Figure 1: Flowchart of study population for primary analyses in a) AASK and b) VA NEPHRON-D.

a)

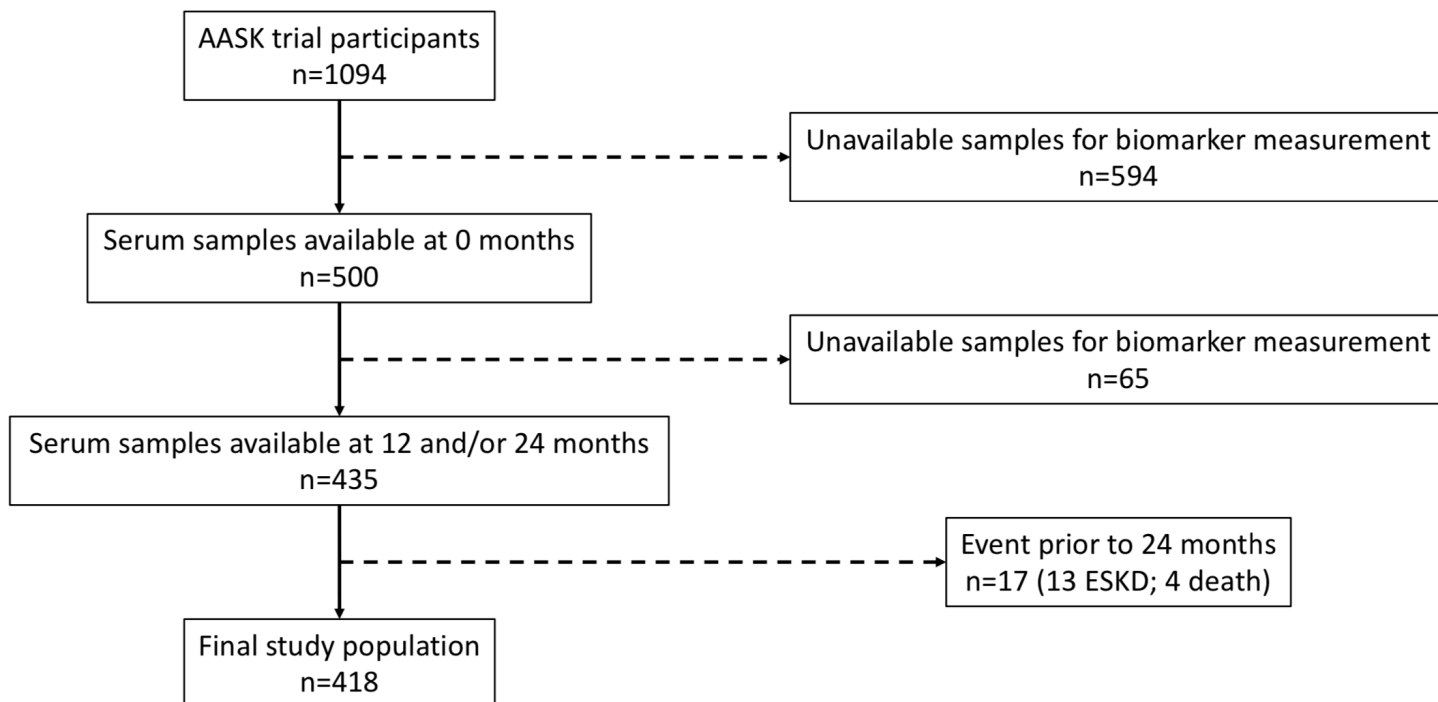

b)

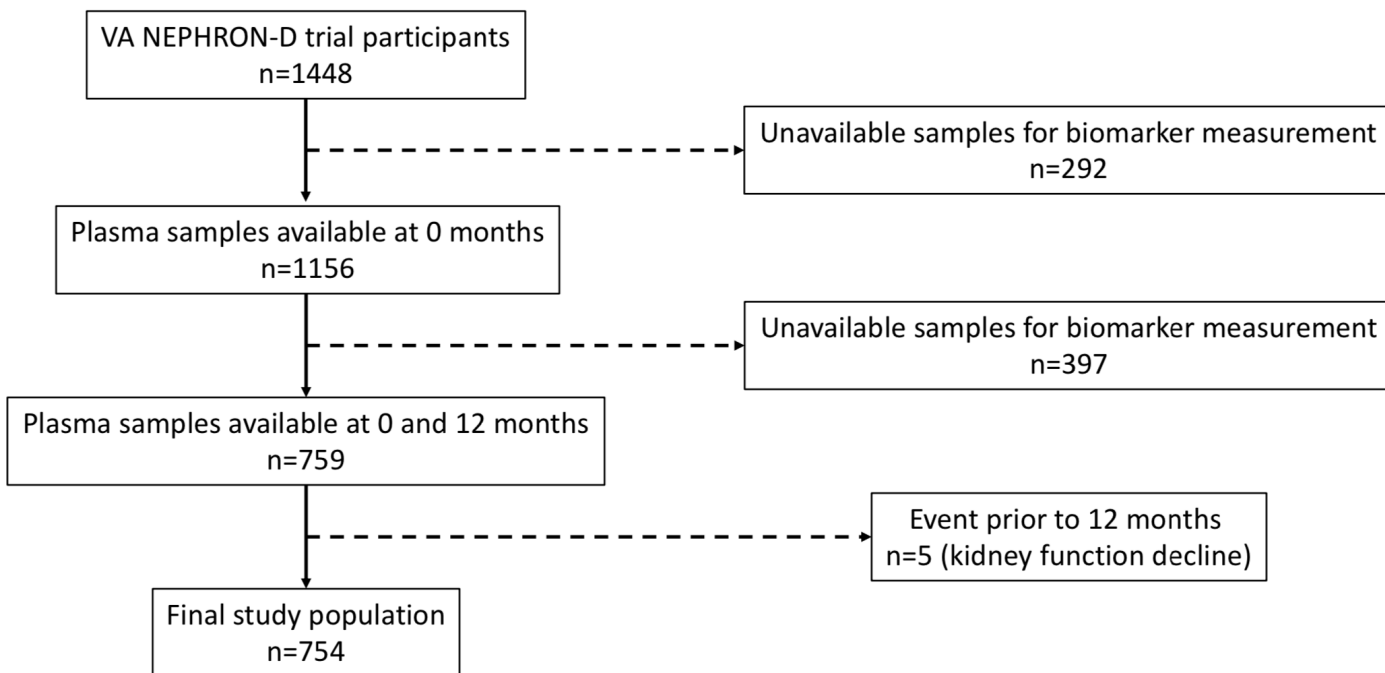

Abbreviations: AASK=African American Study of Kidney Disease and Hypertension; ESKD=end-stage kidney disease; VA NEPHRON-D=Veterans Affairs Nephropathy in Diabetes.

Supplemental Figure 2: Pearson's correlation coefficients of TNFR1 and TNFR2 slopes with biomarker levels and kidney function measures in AASK.

| TNFR1                    |                 |                          |                    |                         |                |          |               |           |
|--------------------------|-----------------|--------------------------|--------------------|-------------------------|----------------|----------|---------------|-----------|
|                          | ln(TNFR1) slope | t <sub>0</sub> ln(TNFR1) | t <sub>0</sub> GFR | t <sub>0</sub> ln(UPCR) | Last ln(TNFR1) | Last GFR | Last ln(UPCR) | GFR slope |
| ln(TNFR1) slope          | 1.00            |                          |                    |                         |                |          |               |           |
| t <sub>0</sub> ln(TNFR1) | 0.44            | 1.00                     |                    |                         |                |          |               |           |
| t <sub>0</sub> GFR       | -0.44           | -0.74                    | 1.00               |                         |                |          |               |           |
| t <sub>0</sub> ln(UPCR)  | 0.49            | 0.57                     | -0.45              | 1.00                    |                |          |               |           |
| Last ln(TNFR1)           | 0.85            | 0.85                     | -0.69              | 0.62                    | 1.00           |          |               |           |
| Last GFR                 | -0.71           | -0.74                    | 0.75               | -0.55                   | -0.85          | 1.00     |               |           |
| Last ln(UPCR)            | 0.55            | 0.49                     | -0.39              | 0.70                    | 0.61           | -0.50    | 1.00          |           |
| GFR slope                | -0.68           | -0.51                    | 0.39               | -0.45                   | -0.70          | 0.85     | -0.39         | 1.00      |

| TNFR2                    |                 |                          |                    |                         |                |          |               |           |
|--------------------------|-----------------|--------------------------|--------------------|-------------------------|----------------|----------|---------------|-----------|
|                          | ln(TNFR2) slope | t <sub>0</sub> ln(TNFR2) | t <sub>0</sub> GFR | t <sub>0</sub> ln(UPCR) | Last ln(TNFR2) | Last GFR | Last ln(UPCR) | GFR slope |
| ln(TNFR2) slope          | 1.00            |                          |                    |                         |                |          |               |           |
| t <sub>0</sub> ln(TNFR2) | 0.40            | 1.00                     |                    |                         |                |          |               |           |
| t <sub>0</sub> GFR       | -0.42           | -0.66                    | 1.00               |                         |                |          |               |           |
| t <sub>0</sub> ln(UPCR)  | 0.47            | 0.53                     | -0.45              | 1.00                    |                |          |               |           |
| Last ln(TNFR2)           | 0.81            | 0.86                     | -0.65              | 0.59                    | 1.00           |          |               |           |
| Last GFR                 | -0.64           | -0.65                    | 0.75               | -0.55                   | -0.77          | 1.00     |               |           |
| Last ln(UPCR)            | 0.49            | 0.46                     | -0.39              | 0.70                    | 0.57           | -0.50    | 1.00          |           |
| GFR slope                | -0.61           | -0.45                    | 0.39               | -0.45                   | -0.62          | 0.85     | -0.39         | 1.00      |

Abbreviation: t<sub>0</sub>=measurement at 0 months; Last=measurement at 24 months or last available visit; TNFR1=soluble tumor necrosis factor receptor 1; TNFR2=soluble tumor necrosis factor receptor 2; GFR=glomerular filtration rate; UPCR=urine protein-to-creatinine ratio.

Red denotes negative correlation; green denotes positive correlation; intensity of shading reflects degree of correlation.

Supplemental Figure 3: Distributions of baseline TNFR1 and TNFR2 in AASK and VA NEPHRON-D, by outcome.

a) AASK

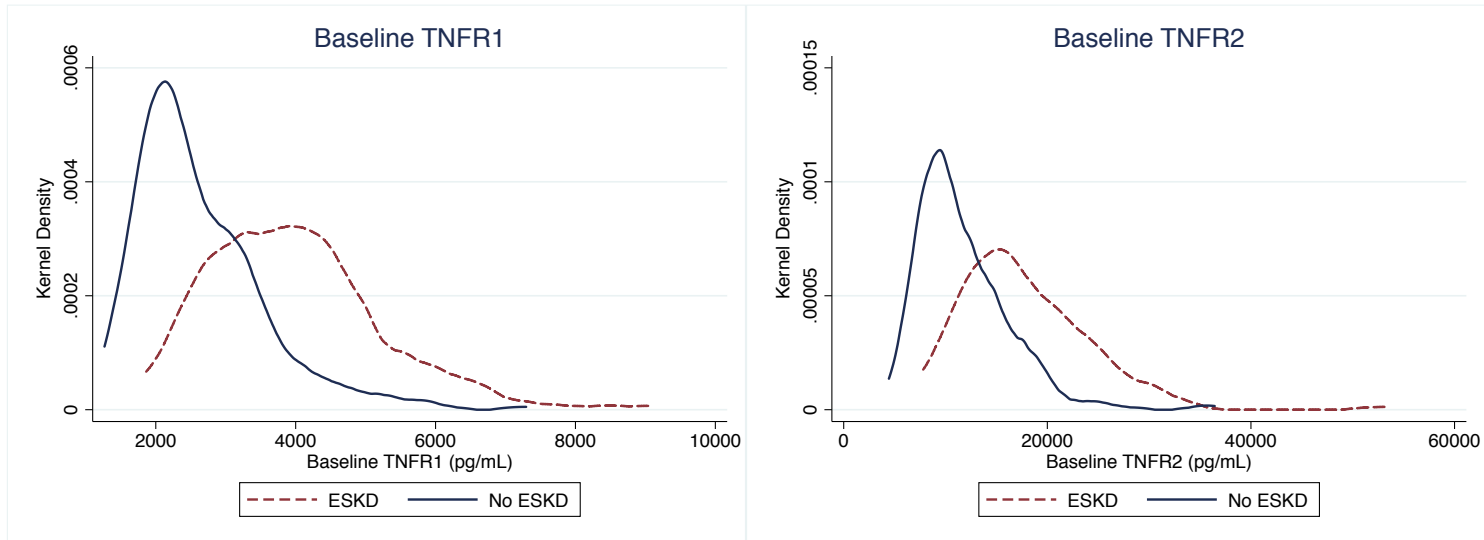

b) VA NEPHRON-D

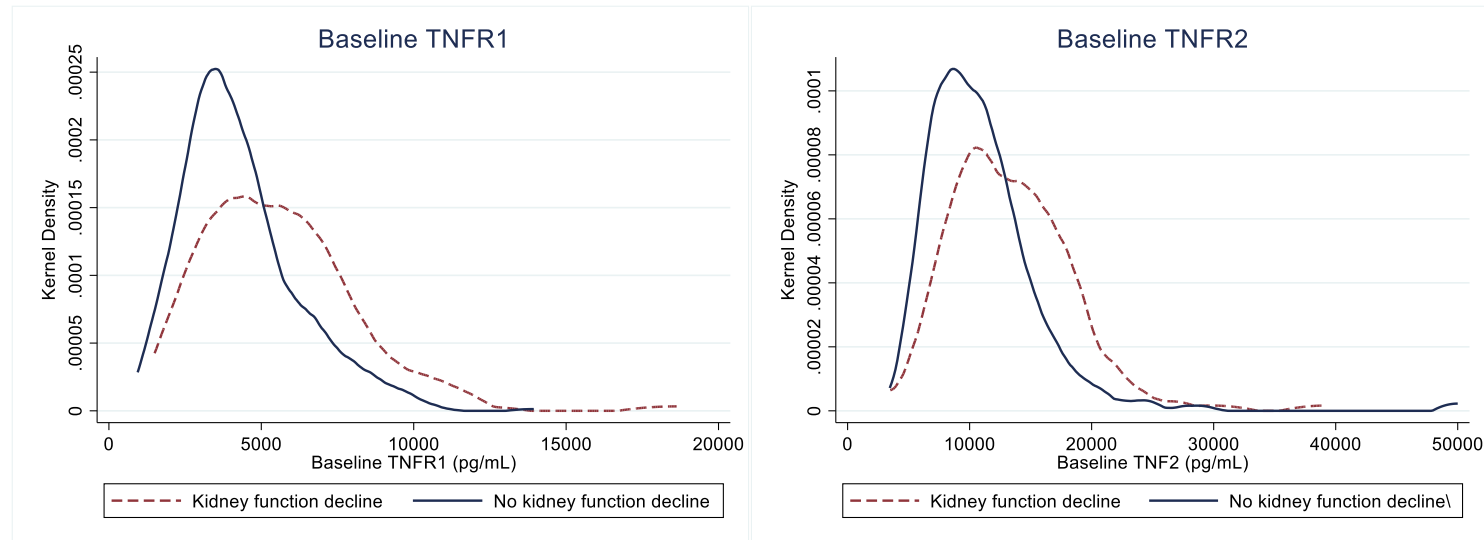



Supplemental Figure 4: Calibration plots of observed vs. predicted 5-year risk for ESKD in AASK and 2-year risk for kidney function decline in VA NEPHRON-D.

a) AASK

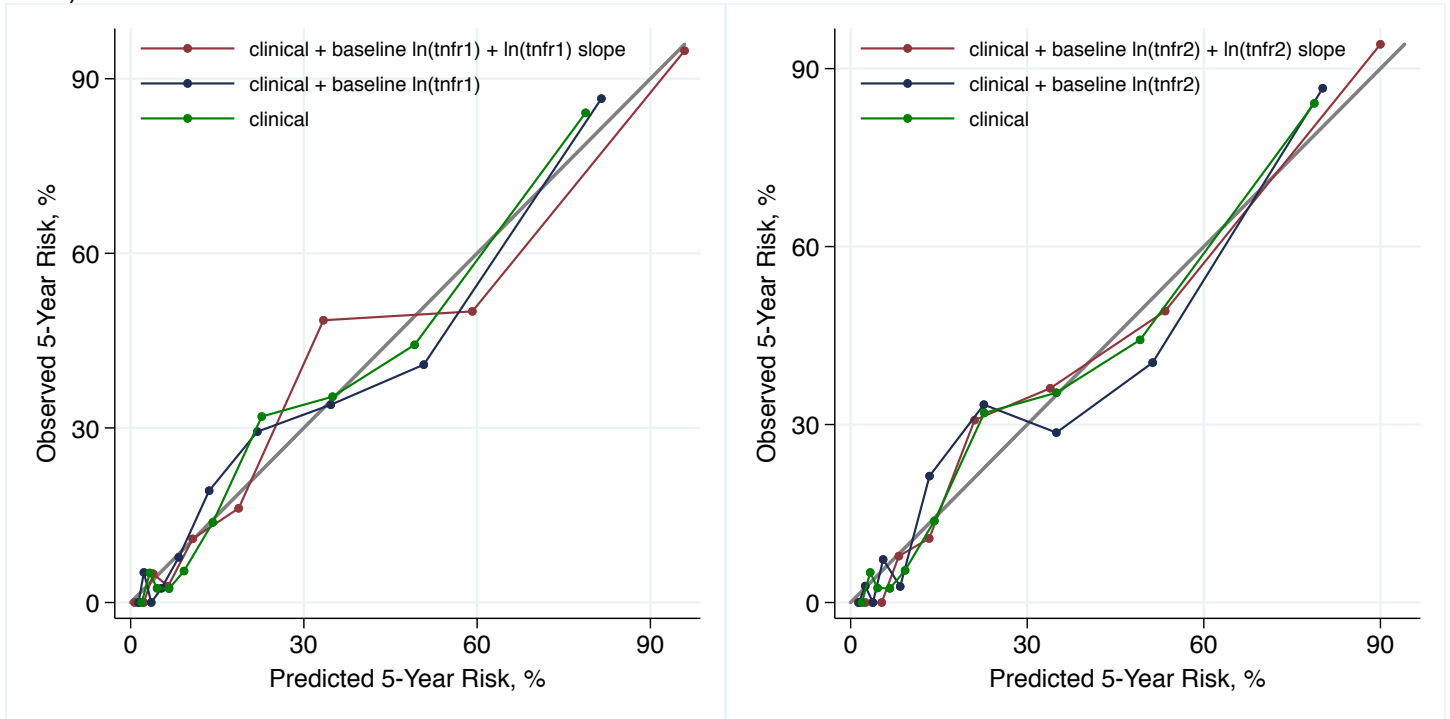

b) VA NEPHRON-D

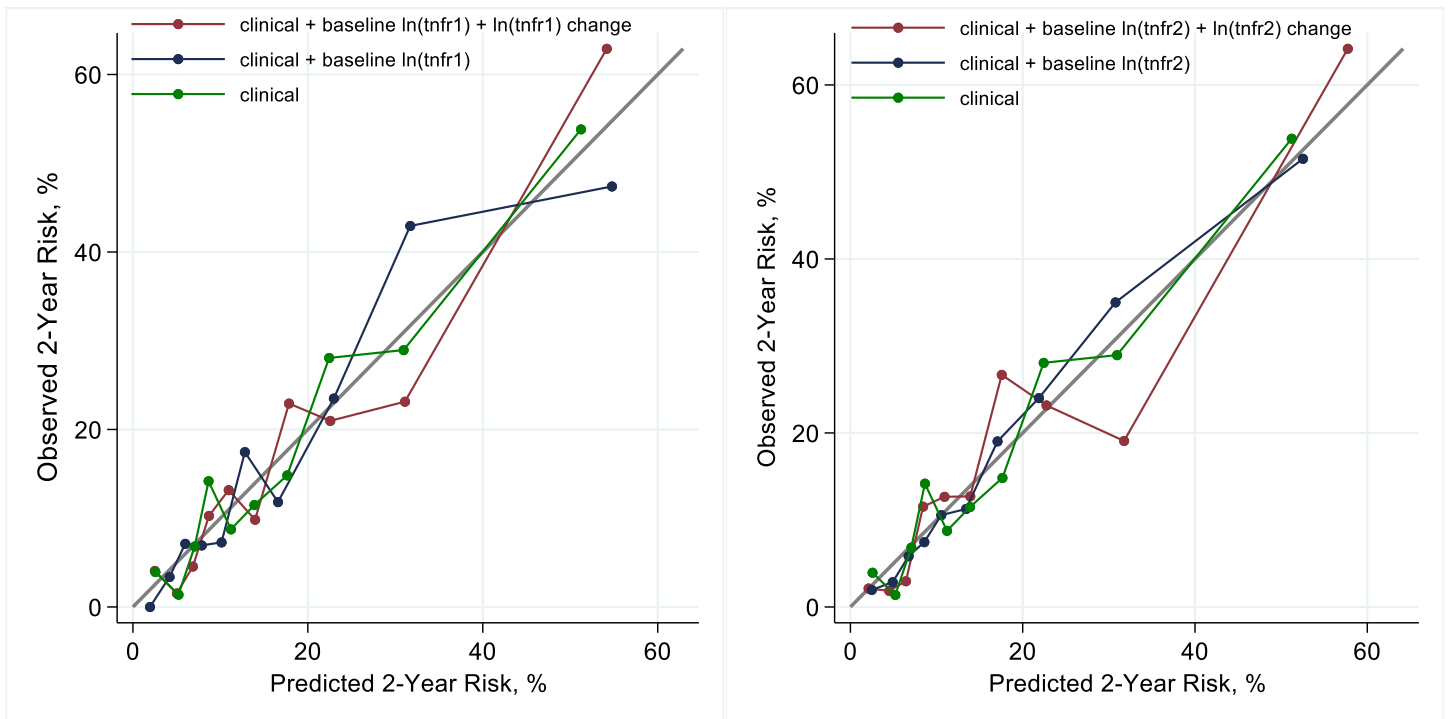

Supplemental Figure 5: Pearson's correlation coefficients of TNFR1 and TNFR2 change with biomarker levels and kidney function measures in VA NEPHRON-D.

| TNFR1                     |                  |                          |                     |                         |                           |                      |                          |             |
|---------------------------|------------------|--------------------------|---------------------|-------------------------|---------------------------|----------------------|--------------------------|-------------|
|                           | ln(TNFR1) change | t <sub>0</sub> ln(TNFR1) | t <sub>0</sub> eGFR | t <sub>0</sub> ln(UACR) | t <sub>12</sub> ln(TNFR1) | t <sub>12</sub> eGFR | t <sub>12</sub> ln(UACR) | eGFR change |
| ln(TNFR1) change          | 1.00             |                          |                     |                         |                           |                      |                          |             |
| t <sub>0</sub> ln(TNFR1)  | -0.35            | 1.00                     |                     |                         |                           |                      |                          |             |
| t <sub>0</sub> eGFR       | -0.03            | -0.60                    | 1.00                |                         |                           |                      |                          |             |
| t <sub>0</sub> ln(UACR)   | 0.12             | 0.31                     | -0.13               | 1.00                    |                           |                      |                          |             |
| t <sub>12</sub> ln(TNFR1) | 0.45             | 0.68                     | -0.60               | 0.39                    | 1.00                      |                      |                          |             |
| t <sub>12</sub> eGFR      | -0.16            | -0.57                    | 0.82                | -0.28                   | -0.67                     | 1.00                 |                          |             |
| t <sub>12</sub> ln(UACR)  | 0.05             | 0.26                     | -0.17               | 0.59                    | 0.29                      | -0.14                | 1.00                     |             |
| eGFR change               | -0.25            | 0.02                     | -0.22               | -0.27                   | -0.18                     | 0.38                 | 0.03                     | 1.00        |

| TNFR2                     |                  |                          |                     |                         |                           |                      |                          |             |
|---------------------------|------------------|--------------------------|---------------------|-------------------------|---------------------------|----------------------|--------------------------|-------------|
|                           | ln(TNFR2) change | t <sub>0</sub> ln(TNFR2) | t <sub>0</sub> eGFR | t <sub>0</sub> ln(UACR) | t <sub>12</sub> ln(TNFR2) | t <sub>12</sub> eGFR | t <sub>12</sub> ln(UACR) | eGFR change |
| ln(TNFR2) change          | 1.00             |                          |                     |                         |                           |                      |                          |             |
| t <sub>0</sub> ln(TNFR2)  | -0.15            | 1.00                     |                     |                         |                           |                      |                          |             |
| t <sub>0</sub> eGFR       | 0.01             | -0.57                    | 1.00                |                         |                           |                      |                          |             |
| t <sub>0</sub> ln(UACR)   | 0.19             | 0.33                     | -0.13               | 1.00                    |                           |                      |                          |             |
| t <sub>12</sub> ln(TNFR2) | 0.45             | 0.82                     | -0.50               | 0.41                    | 1.00                      |                      |                          |             |
| t <sub>12</sub> eGFR      | -0.15            | -0.56                    | 0.82                | -0.28                   | -0.60                     | 1.00                 |                          |             |
| t <sub>12</sub> ln(UACR)  | 0.05             | 0.31                     | -0.17               | 0.59                    | 0.31                      | -0.14                | 1.00                     |             |
| eGFR change               | -0.29            | -0.02                    | -0.22               | -0.27                   | -0.19                     | 0.38                 | 0.03                     | 1.00        |

Abbreviation: t<sub>0</sub>=measurement at 0 months; t<sub>12</sub>=measurement at 12 months; TNFR1=soluble tumor necrosis factor receptor 1; TNFR2=soluble tumor necrosis factor receptor 2; eGFR=estimated glomerular filtration rate; UACR=urine albumin-to-creatinine ratio.

Red denotes negative correlation; green denotes positive correlation; intensity of shading reflects degree of correlation.

## CKD Biomarkers Consortium Collaborators: Phase II

|                                                         |                                                                                                                                                                                                           |
|---------------------------------------------------------|-----------------------------------------------------------------------------------------------------------------------------------------------------------------------------------------------------------|
| <b>Boston University School of Medicine</b>             | Vasan S. Ramachandran, M.D. (Chair, Steering Committee), Joseph Massaro Ph.D.                                                                                                                             |
| <b>Broad Institute</b>                                  | Clary Clish Ph.D.                                                                                                                                                                                         |
| <b>Case Western Reserve University</b>                  | Jeffrey Schelling, M.D. (PI),                                                                                                                                                                             |
| <b>The Children's Hospital of Philadelphia</b>          | Michelle Denburg, M.D., MSCE (PI), Susan Furth, M.D., Ph.D.(PI)                                                                                                                                           |
| <b>Children's Mercy Hospital</b>                        | Bradley Warady, M.D.                                                                                                                                                                                      |
| <b>Brigham and Women's Hospital, Harvard University</b> | Joseph Bonventre, M.D., Ph.D. (PI), Sushrut Waikar, M.D., MPH. (PI), Gearoid McMahon M.B., BCH, Venkata Sabbiseti Ph.D.                                                                                   |
| <b>Johns Hopkins University</b>                         | Josef Coresh, M.D., Ph.D. (PI), Morgan Grams M.D., Casey Rebholz, Ph.D., Alison Abraham, Ph.D., Adrienne Tin Ph.D., Chirag Parikh, MD, PhD (PI)                                                           |
| <b>University of Louisville</b>                         | Jon Klein, M.D., Ph.D.                                                                                                                                                                                    |
| <b>Icahn School of Medicine at Mount Sinai</b>          | Steven Coca, DO, MS (PI), Bart S Ferket, M.D., PhD, Girish N. Nadkarni, MD, MPH, CPH,                                                                                                                     |
| <b>Massachusetts General Hospital</b>                   | Eugene Rhee M.D. (PI)                                                                                                                                                                                     |
| <b>National Institutes of Health</b>                    | Paul L. Kimmel, M.D. (NIDDK), Daniel Gossett, Ph.D. (NIDDK)                                                                                                                                               |
| <b>Ohio State University</b>                            | Brad Rovin, M.D. (PI)                                                                                                                                                                                     |
| <b>San Francisco VA Medical Center</b>                  | Michael G. Shlipak, M.D. (PI)                                                                                                                                                                             |
| <b>Tufts Medical Center</b>                             | M Sarnak, M.D. (PI), Andrew S. Levey, M.D., Lesley A. Inker, M.D., M.S., Meredith Foster, Ph.D.                                                                                                           |
| <b>University of Alabama at Birmingham</b>              | Orlando M. Gutiérrez, M.D. (PI)                                                                                                                                                                           |
| <b>University of California San Diego</b>               | Joachim Ix, M.D. (PI)                                                                                                                                                                                     |
| <b>University of California San Francisco</b>           | Ruth Dubin, M.D. (PI)                                                                                                                                                                                     |
| <b>University of Minnesota</b>                          | Jesse Seegmiller, Ph.D.                                                                                                                                                                                   |
| <b>University of North Carolina</b>                     | Tom Hostetter, M.D. (PI),                                                                                                                                                                                 |
| <b>University of Pennsylvania</b>                       | Rajat Deo, M.D. (PI)                                                                                                                                                                                      |
| <b>University of Pennsylvania Coordinating Center</b>   | Harold I. Feldman, M.D., MSCE (PI), Amanda Anderson, PhD, Theodore Mifflin, Ph.D., D.A.B.C.C., Dawei Xie, Ph.D., Haochang Shou Ph.D., Shawn Ballard, M.S., Krista Whitehead, M.S., Heather Collins, Ph.D. |
| <b>Yale School of Medicine</b>                          | Jason Greenberg, M.D.                                                                                                                                                                                     |
| <b>Zuckerberg San Francisco General Hospital</b>        | Peter Ganz, M.D. (PI)                                                                                                                                                                                     |

v.5 June 16, 2021
